# Supplementary material
Source: Springer Nature journal article supplement (https://www.springermedizin.de/resource/supplementary/12885_2001_13_MOESM4_ESM.pdf/9460020)

Figure 5. Corrected and uncorrected probability of developing invasive cancers of the corpus uteri and other uterus (not otherwise specified) across the age span in Utah

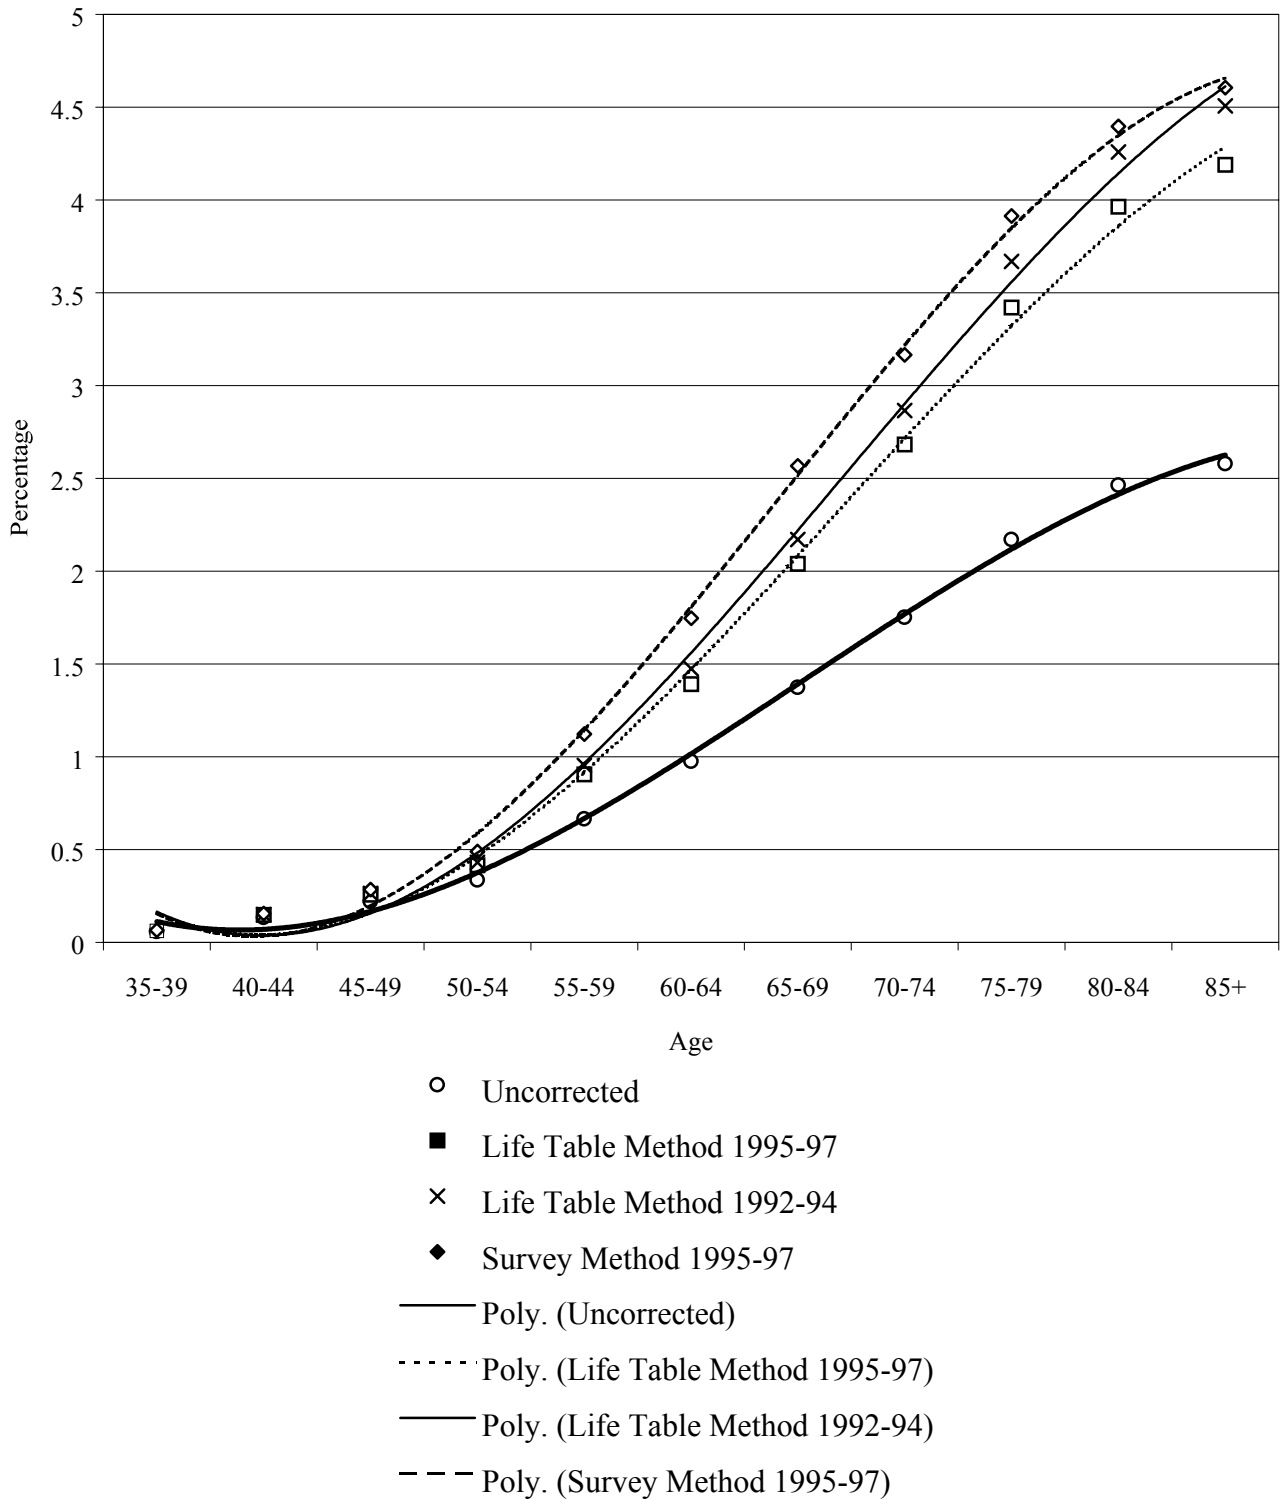

Supplement: MOESM4 [file 9460020]
